# Supplementary material for: Nucleophile-dependent regioselective ring opening of 2-substituted N,N-dibenzylaziridinium ions: bromide versus hydride
Source: Royal Society of Chemistry journal article supplement (doi:10.1039/b822763b), 2009-01-01
Supplement: b822763b.pdf [file b822763b.pdf]

## ESI

### Nucleophile-dependent regioselective ring opening of 2-substituted *N,N*-dibenzylaziridinium ions: bromide versus hydride

Sae Young Yun, Saron Catak, Won Koo Lee,\* Matthias D'hooghe, Norbert De Kimpe,  
Veronique Van Speybroeck, Michel Waroquier, Yongeun Kim, and Hyun-Joon Ha\*

#### Table of Contents

\*Data of **reactant** (pre-reactive complex of 2A and BH<sub>4</sub><sup>-</sup>): S3-S6

Table T1: Cartesian coordinates and energy of B3LYP/6-31++G\*\* optimized conformation for **reactant**.

Table T2: Cartesian coordinates and energy of MPW1B95/6-31++G\*\* optimized conformation for **reactant**.

\*Data of **TS-a**: S7-S10

Table T3: Cartesian coordinates, energy and imaginary frequency of B3LYP/6-31++G\*\* optimized conformation for **TS-a**.

Table T4: Cartesian coordinates, energy and imaginary frequency of MPW1B95/6-31++G\*\* optimized conformation for **TS-a**.

\*Data of **TS-b**: S11-S14

Table T5: Cartesian coordinates, energy and imaginary frequency of B3LYP/6-31++G\*\* optimized conformation for **TS-b**.

Table T6: Cartesian coordinates, energy and imaginary frequency of MPW1B95/6-31++G\*\* optimized conformation for **TS-b**.

\*Data of **product-a**: S15-S18

Table T7: Cartesian coordinates and energy of B3LYP/6-31++G\*\* optimized conformation for **product-a**.

Table T8: Cartesian coordinates and energy of MPW1B95/6-31++G\*\* optimized conformation for **product-a**.

\*Data of **product-b**: S19-S22

Table T9: Cartesian coordinates and energy of B3LYP/6-31++G\*\* optimized conformation for **product-b**.

Table T10: Cartesian coordinates and energy of MPW1B95/6-31++G\*\* optimized conformation for **product-b**.

\*Data of **2A**: S23-S24

Table T11: Cartesian coordinates and single point energy of B3LYP/6-31++G\*\* for **2A**.

\*Data of **2A** in geometry of **TS-a**: S25-S26

Table T12: Cartesian coordinates and single point energy of B3LYP/6-31++G\*\* for **2A** in geometry of **TS-a**.

\*Data of **2A** in geometry of **TS-b**: S27-S28

Table T13: Cartesian coordinates and single point energy of B3LYP/6-31++G\*\* for **2A** in geometry of **TS-b**.

Procedures and spectral data S29-S32

Table T1: Cartesian coordinates and energy of B3LYP/6-31++G\*\* optimized conformation for **reactant**.

Standard orientation:

| Center Number | Atomic Number | Atomic Type | Coordinates (Angstroms) |           |           |
|---------------|---------------|-------------|-------------------------|-----------|-----------|
|               |               |             | X                       | Y         | Z         |
| 1             | 6             | 0           | -2.046278               | 4.072663  | -0.310369 |
| 2             | 6             | 0           | -3.426415               | 3.895241  | -0.429452 |
| 3             | 6             | 0           | -3.943732               | 2.619660  | -0.675329 |
| 4             | 6             | 0           | -3.078701               | 1.531702  | -0.801062 |
| 5             | 6             | 0           | -1.688327               | 1.702604  | -0.688401 |
| 6             | 6             | 0           | -1.176588               | 2.986570  | -0.444119 |
| 7             | 6             | 0           | -0.793866               | 0.492150  | -0.873240 |
| 8             | 6             | 0           | 0.452049                | 0.721358  | -1.729413 |
| 9             | 7             | 0           | -0.389845               | -0.193577 | 0.466212  |
| 10            | 6             | 0           | -0.589341               | 0.492846  | 1.786535  |
| 11            | 6             | 0           | 0.777946                | 0.387797  | 1.245487  |
| 12            | 6             | 0           | 1.833301                | -0.528242 | 1.838265  |
| 13            | 8             | 0           | 2.468870                | -1.346363 | 0.862331  |
| 14            | 6             | 0           | 3.617812                | -0.911309 | 0.218558  |
| 15            | 6             | 0           | 4.095796                | 0.400832  | 0.259208  |
| 16            | 6             | 0           | 5.266296                | 0.710882  | -0.444725 |
| 17            | 6             | 0           | 5.945940                | -0.259848 | -1.181472 |
| 18            | 6             | 0           | 5.447632                | -1.567435 | -1.216280 |
| 19            | 6             | 0           | 4.287263                | -1.897212 | -0.517831 |
| 20            | 6             | 0           | -0.546556               | -1.695971 | 0.427326  |
| 21            | 6             | 0           | -1.965928               | -2.170486 | 0.209268  |
| 22            | 6             | 0           | -2.335306               | -2.733219 | -1.021293 |
| 23            | 6             | 0           | -3.633257               | -3.206163 | -1.231306 |
| 24            | 6             | 0           | -4.580404               | -3.122626 | -0.208531 |
| 25            | 6             | 0           | -4.220566               | -2.575487 | 1.026892  |
| 26            | 6             | 0           | -2.921766               | -2.109459 | 1.235403  |
| 27            | 5             | 0           | 1.943206                | 3.320860  | 1.523387  |
| 28            | 1             | 0           | -0.155443               | -2.080856 | 1.368247  |
| 29            | 1             | 0           | 0.114307                | -2.049694 | -0.365608 |
| 30            | 1             | 0           | -1.404791               | -0.277034 | -1.346013 |
| 31            | 1             | 0           | 1.050497                | -0.191241 | -1.812515 |
| 32            | 1             | 0           | 1.090884                | 1.517667  | -1.340524 |
| 33            | 1             | 0           | 0.128178                | 1.009003  | -2.733807 |
| 34            | 1             | 0           | 1.404110                | -1.222233 | 2.567530  |
| 35            | 1             | 0           | 2.542368                | 0.119370  | 2.364711  |
| 36            | 1             | 0           | 3.584380                | 1.190522  | 0.803072  |
| 37            | 1             | 0           | 3.894478                | -2.909343 | -0.522107 |
| 38            | 1             | 0           | 5.966408                | -2.336049 | -1.782275 |
| 39            | 1             | 0           | 5.633101                | 1.732449  | -0.412930 |
| 40            | 1             | 0           | 6.851210                | -0.003675 | -1.723244 |
| 41            | 1             | 0           | -1.600543               | -2.811188 | -1.818978 |
| 42            | 1             | 0           | -2.655099               | -1.704974 | 2.207530  |
| 43            | 1             | 0           | -4.948064               | -2.520037 | 1.831023  |
| 44            | 1             | 0           | -3.900360               | -3.641017 | -2.189675 |
| 45            | 1             | 0           | -5.589654               | -3.489758 | -0.368249 |

Supplementary Material (ESI) for Chemical Communications  
This journal is (c) The Royal Society of Chemistry 2009

|    |   |   |           |           |           |
|----|---|---|-----------|-----------|-----------|
| 46 | 1 | 0 | -0.110343 | 3.151918  | -0.317352 |
| 47 | 1 | 0 | -3.486725 | 0.542605  | -0.994983 |
| 48 | 1 | 0 | -5.015434 | 2.472135  | -0.772216 |
| 49 | 1 | 0 | -1.633616 | 5.055414  | -0.105099 |
| 50 | 1 | 0 | -4.096236 | 4.744508  | -0.329697 |
| 51 | 1 | 0 | 2.608324  | 2.505928  | 2.173964  |
| 52 | 1 | 0 | 2.436417  | 4.432096  | 1.602372  |
| 53 | 1 | 0 | 0.784377  | 3.321170  | 1.946727  |
| 54 | 1 | 0 | 1.937515  | 2.961798  | 0.329008  |
| 55 | 1 | 0 | 1.164327  | 1.304461  | 0.797091  |
| 56 | 1 | 0 | -0.905176 | -0.175919 | 2.581142  |
| 57 | 1 | 0 | -1.089492 | 1.452535  | 1.739076  |

-----

HF=-1087.3862084

|                                              |              |
|----------------------------------------------|--------------|
| Zero-point correction=                       | 0.481355     |
| (Hartree/Particle)                           |              |
| Thermal correction to Energy=                | 0.507756     |
| Thermal correction to Enthalpy=              | 0.508700     |
| Thermal correction to Gibbs Free Energy=     | 0.422133     |
| Sum of electronic and zero-point Energies=   | -1086.904853 |
| Sum of electronic and thermal Energies=      | -1086.878452 |
| Sum of electronic and thermal Enthalpies=    | -1086.877508 |
| Sum of electronic and thermal Free Energies= | -1086.964075 |

Table T2: Cartesian coordinates and energy of MPW1B95/6-31++G\*\* optimized conformation for **reactant**.

Standard orientation:

| Center Number | Atomic Number | Atomic Type | Coordinates (Angstroms) |           |           |
|---------------|---------------|-------------|-------------------------|-----------|-----------|
|               |               |             | X                       | Y         | Z         |
| 1             | 6             | 0           | -1.914299               | 3.914039  | -0.374620 |
| 2             | 6             | 0           | -3.277625               | 3.717825  | -0.551760 |
| 3             | 6             | 0           | -3.766871               | 2.442424  | -0.812137 |
| 4             | 6             | 0           | -2.890546               | 1.369671  | -0.894619 |
| 5             | 6             | 0           | -1.518243               | 1.564162  | -0.728363 |
| 6             | 6             | 0           | -1.032284               | 2.844629  | -0.469466 |
| 7             | 6             | 0           | -0.598911               | 0.379245  | -0.824789 |
| 8             | 6             | 0           | 0.696867                | 0.613686  | -1.575640 |
| 9             | 7             | 0           | -0.298440               | -0.237667 | 0.546070  |
| 10            | 6             | 0           | -0.537455               | 0.506578  | 1.808904  |
| 11            | 6             | 0           | 0.835132                | 0.341288  | 1.328804  |
| 12            | 6             | 0           | 1.835831                | -0.579605 | 1.973908  |
| 13            | 8             | 0           | 2.449221                | -1.439122 | 1.041637  |
| 14            | 6             | 0           | 3.473677                | -0.959051 | 0.263906  |
| 15            | 6             | 0           | 3.899025                | 0.363549  | 0.266581  |
| 16            | 6             | 0           | 4.939653                | 0.732205  | -0.581225 |
| 17            | 6             | 0           | 5.547158                | -0.191999 | -1.418208 |
| 18            | 6             | 0           | 5.106679                | -1.512083 | -1.407989 |
| 19            | 6             | 0           | 4.072730                | -1.899248 | -0.570950 |
| 20            | 6             | 0           | -0.520844               | -1.711038 | 0.570721  |
| 21            | 6             | 0           | -1.948427               | -2.078243 | 0.282459  |
| 22            | 6             | 0           | -2.283079               | -2.674878 | -0.931395 |
| 23            | 6             | 0           | -3.602839               | -2.994080 | -1.224917 |
| 24            | 6             | 0           | -4.603789               | -2.717736 | -0.303122 |
| 25            | 6             | 0           | -4.278451               | -2.136021 | 0.916698  |
| 26            | 6             | 0           | -2.958740               | -1.824018 | 1.209197  |
| 27            | 5             | 0           | 1.921283                | 3.227549  | 1.661373  |
| 28            | 1             | 0           | -0.213366               | -2.069561 | 1.550934  |
| 29            | 1             | 0           | 0.161702                | -2.139140 | -0.162814 |
| 30            | 1             | 0           | -1.152971               | -0.414217 | -1.323316 |
| 31            | 1             | 0           | 1.331417                | -0.274396 | -1.550343 |
| 32            | 1             | 0           | 1.270552                | 1.452814  | -1.179707 |
| 33            | 1             | 0           | 0.455125                | 0.833705  | -2.615441 |
| 34            | 1             | 0           | 1.367629                | -1.232519 | 2.711543  |
| 35            | 1             | 0           | 2.556852                | 0.055339  | 2.495722  |
| 36            | 1             | 0           | 3.441478                | 1.124652  | 0.890234  |
| 37            | 1             | 0           | 3.724019                | -2.923776 | -0.541445 |
| 38            | 1             | 0           | 5.573204                | -2.247422 | -2.051973 |
| 39            | 1             | 0           | 5.261634                | 1.765881  | -0.579560 |
| 40            | 1             | 0           | 6.354664                | 0.109737  | -2.072593 |
| 41            | 1             | 0           | -1.503425               | -2.892056 | -1.653547 |
| 42            | 1             | 0           | -2.719969               | -1.380012 | 2.167638  |
| 43            | 1             | 0           | -5.053117               | -1.929367 | 1.643949  |
| 44            | 1             | 0           | -3.846971               | -3.457139 | -2.172390 |
| 45            | 1             | 0           | -5.633596               | -2.962726 | -0.529784 |

Supplementary Material (ESI) for Chemical Communications  
This journal is (c) The Royal Society of Chemistry 2009

|    |   |   |           |           |           |
|----|---|---|-----------|-----------|-----------|
| 46 | 1 | 0 | 0.025072  | 3.016208  | -0.296309 |
| 47 | 1 | 0 | -3.272160 | 0.372341  | -1.091868 |
| 48 | 1 | 0 | -4.828878 | 2.283515  | -0.951688 |
| 49 | 1 | 0 | -1.525453 | 4.899455  | -0.153178 |
| 50 | 1 | 0 | -3.960104 | 4.555901  | -0.483492 |
| 51 | 1 | 0 | 2.474780  | 2.363097  | 2.352245  |
| 52 | 1 | 0 | 2.423432  | 4.315512  | 1.860989  |
| 53 | 1 | 0 | 0.718794  | 3.238167  | 1.932350  |
| 54 | 1 | 0 | 2.062486  | 2.923312  | 0.460740  |
| 55 | 1 | 0 | 1.248174  | 1.228935  | 0.852844  |
| 56 | 1 | 0 | -0.894707 | -0.121397 | 2.615692  |
| 57 | 1 | 0 | -1.003484 | 1.476254  | 1.700248  |

-----

HF=-1086.8334456

|                                              |              |
|----------------------------------------------|--------------|
| Zero-point correction=<br>(Hartree/Particle) | 0.488795     |
| Thermal correction to Energy=                | 0.514118     |
| Thermal correction to Enthalpy=              | 0.515062     |
| Thermal correction to Gibbs Free Energy=     | 0.432848     |
| Sum of electronic and zero-point Energies=   | -1086.344651 |
| Sum of electronic and thermal Energies=      | -1086.319327 |
| Sum of electronic and thermal Enthalpies=    | -1086.318383 |
| Sum of electronic and thermal Free Energies= | -1086.400598 |

Table T3: Cartesian coordinates, energy and imaginary frequency of B3LYP/6-31++G\*\* optimized conformation for **TS-a**.

Standard orientation:

| Center Number | Atomic Number | Atomic Type | Coordinates (Angstroms) |           |           |
|---------------|---------------|-------------|-------------------------|-----------|-----------|
|               |               |             | X                       | Y         | Z         |
| 1             | 6             | 0           | 0.381402                | 3.990555  | -0.913623 |
| 2             | 6             | 0           | -0.790718               | 4.683406  | -0.606901 |
| 3             | 6             | 0           | -1.984392               | 3.978332  | -0.427543 |
| 4             | 6             | 0           | -1.997151               | 2.588242  | -0.547334 |
| 5             | 6             | 0           | -0.822472               | 1.878632  | -0.846642 |
| 6             | 6             | 0           | 0.365024                | 2.598630  | -1.038262 |
| 7             | 6             | 0           | -0.897351               | 0.363014  | -0.969545 |
| 8             | 6             | 0           | 0.043299                | -0.238141 | -2.020957 |
| 9             | 7             | 0           | -0.712922               | -0.342808 | 0.362312  |
| 10            | 6             | 0           | -0.473592               | 0.491573  | 1.853755  |
| 11            | 6             | 0           | 0.592872                | -0.125166 | 1.076988  |
| 12            | 6             | 0           | 1.414092                | -1.285714 | 1.602025  |
| 13            | 8             | 0           | 2.100037                | -1.960514 | 0.548692  |
| 14            | 6             | 0           | 3.295733                | -1.450792 | 0.083125  |
| 15            | 6             | 0           | 3.883471                | -2.177842 | -0.962071 |
| 16            | 6             | 0           | 5.094645                | -1.755518 | -1.506057 |
| 17            | 6             | 0           | 5.730006                | -0.607960 | -1.016527 |
| 18            | 6             | 0           | 5.136088                | 0.107543  | 0.023372  |
| 19            | 6             | 0           | 3.917782                | -0.299709 | 0.582356  |
| 20            | 6             | 0           | -1.350480               | -1.687991 | 0.450784  |
| 21            | 6             | 0           | -2.838856               | -1.676703 | 0.169526  |
| 22            | 6             | 0           | -3.353362               | -2.377142 | -0.929185 |
| 23            | 6             | 0           | -4.728948               | -2.405543 | -1.178667 |
| 24            | 6             | 0           | -5.606647               | -1.728886 | -0.329801 |
| 25            | 6             | 0           | -5.103758               | -1.029844 | 0.772604  |
| 26            | 6             | 0           | -3.731021               | -1.007705 | 1.022286  |
| 27            | 5             | 0           | 1.659137                | 1.511591  | 3.575099  |
| 28            | 1             | 0           | 1.206086                | 0.592163  | 0.540056  |
| 29            | 1             | 0           | -1.175903               | -2.060246 | 1.461598  |
| 30            | 1             | 0           | -0.834283               | -2.368648 | -0.234235 |
| 31            | 1             | 0           | -1.925871               | 0.123430  | -1.248358 |
| 32            | 1             | 0           | -0.136659               | -1.309308 | -2.145202 |
| 33            | 1             | 0           | 1.097510                | -0.109014 | -1.763877 |
| 34            | 1             | 0           | -0.134993               | 0.247550  | -2.984467 |
| 35            | 1             | 0           | 0.799023                | -2.047244 | 2.085096  |
| 36            | 1             | 0           | 2.086582                | -0.879164 | 2.363645  |
| 37            | 1             | 0           | 3.383202                | -3.070694 | -1.323948 |
| 38            | 1             | 0           | 3.488597                | 0.283057  | 1.391859  |
| 39            | 1             | 0           | 5.616440                | 0.998119  | 0.418078  |
| 40            | 1             | 0           | 5.545159                | -2.327733 | -2.312207 |
| 41            | 1             | 0           | 6.674861                | -0.280898 | -1.439281 |
| 42            | 1             | 0           | -2.675873               | -2.909241 | -1.592501 |
| 43            | 1             | 0           | -3.355199               | -0.468846 | 1.887411  |
| 44            | 1             | 0           | -5.781321               | -0.509241 | 1.442868  |
| 45            | 1             | 0           | -5.110676               | -2.955213 | -2.033840 |

Supplementary Material (ESI) for Chemical Communications  
This journal is (c) The Royal Society of Chemistry 2009

|    |   |   |           |           |           |
|----|---|---|-----------|-----------|-----------|
| 46 | 1 | 0 | -6.675376 | -1.749195 | -0.520586 |
| 47 | 1 | 0 | 1.288653  | 2.085755  | -1.286648 |
| 48 | 1 | 0 | -2.928145 | 2.044120  | -0.406569 |
| 49 | 1 | 0 | -2.902948 | 4.509154  | -0.195605 |
| 50 | 1 | 0 | 1.313791  | 4.529228  | -1.050885 |
| 51 | 1 | 0 | -0.775083 | 5.764540  | -0.508334 |
| 52 | 1 | 0 | -1.001340 | -0.073729 | 2.608995  |
| 53 | 1 | 0 | -0.710731 | 1.534468  | 1.716477  |
| 54 | 1 | 0 | 0.452271  | 1.158107  | 3.442820  |
| 55 | 1 | 0 | 2.264027  | 0.535735  | 4.008959  |
| 56 | 1 | 0 | 1.666372  | 2.449394  | 4.350111  |
| 57 | 1 | 0 | 2.082305  | 1.837791  | 2.465103  |

-----

HF=-1087.378084

W= -511.1708

|                                              |              |
|----------------------------------------------|--------------|
| Zero-point correction=<br>(Hartree/Particle) | 0.479857     |
| Thermal correction to Energy=                | 0.506012     |
| Thermal correction to Enthalpy=              | 0.506956     |
| Thermal correction to Gibbs Free Energy=     | 0.420948     |
| Sum of electronic and zero-point Energies=   | -1086.898227 |
| Sum of electronic and thermal Energies=      | -1086.872072 |
| Sum of electronic and thermal Enthalpies=    | -1086.871128 |
| Sum of electronic and thermal Free Energies= | -1086.957136 |



Table T4: Cartesian coordinates, energy and imaginary frequency of MPW1B95/6-31++G\*\* optimized conformation for **TS-a**.

Standard orientation:

| Center Number | Atomic Number | Atomic Type | Coordinates (Angstroms) |           |           |
|---------------|---------------|-------------|-------------------------|-----------|-----------|
|               |               |             | X                       | Y         | Z         |
| 1             | 6             | 0           | 1.109759                | 3.553664  | -0.955417 |
| 2             | 6             | 0           | 0.125725                | 4.465634  | -0.602740 |
| 3             | 6             | 0           | -1.173417               | 4.026502  | -0.376543 |
| 4             | 6             | 0           | -1.479281               | 2.678648  | -0.496650 |
| 5             | 6             | 0           | -0.494896               | 1.752186  | -0.842907 |
| 6             | 6             | 0           | 0.800358                | 2.205125  | -1.080171 |
| 7             | 6             | 0           | -0.868038               | 0.291960  | -0.941046 |
| 8             | 6             | 0           | -0.054508               | -0.495005 | -1.955673 |
| 9             | 7             | 0           | -0.801603               | -0.385526 | 0.390368  |
| 10            | 6             | 0           | -0.466750               | 0.424608  | 1.883018  |
| 11            | 6             | 0           | 0.497340                | -0.317109 | 1.098516  |
| 12            | 6             | 0           | 1.193415                | -1.552228 | 1.598217  |
| 13            | 8             | 0           | 1.886517                | -2.200926 | 0.552967  |
| 14            | 6             | 0           | 3.049055                | -1.634012 | 0.105044  |
| 15            | 6             | 0           | 3.630968                | -2.247972 | -1.002611 |
| 16            | 6             | 0           | 4.811111                | -1.746448 | -1.527586 |
| 17            | 6             | 0           | 5.418942                | -0.630684 | -0.959599 |
| 18            | 6             | 0           | 4.830178                | -0.028125 | 0.141698  |
| 19            | 6             | 0           | 3.645242                | -0.516826 | 0.684426  |
| 20            | 6             | 0           | -1.590115               | -1.619327 | 0.499384  |
| 21            | 6             | 0           | -3.040663               | -1.401286 | 0.167846  |
| 22            | 6             | 0           | -3.663386               | -2.153250 | -0.822378 |
| 23            | 6             | 0           | -5.010998               | -1.965053 | -1.110397 |
| 24            | 6             | 0           | -5.745299               | -1.016709 | -0.412173 |
| 25            | 6             | 0           | -5.129091               | -0.258820 | 0.577836  |
| 26            | 6             | 0           | -3.786725               | -0.451475 | 0.866703  |
| 27            | 5             | 0           | 1.644080                | 1.410499  | 3.374841  |
| 28            | 1             | 0           | 1.181371                | 0.336460  | 0.566186  |
| 29            | 1             | 0           | -1.503359               | -1.969576 | 1.528716  |
| 30            | 1             | 0           | -1.154008               | -2.392141 | -0.139641 |
| 31            | 1             | 0           | -1.922857               | 0.246345  | -1.215786 |
| 32            | 1             | 0           | -0.454629               | -1.501168 | -2.083388 |
| 33            | 1             | 0           | 0.990982                | -0.589001 | -1.657121 |
| 34            | 1             | 0           | -0.089545               | 0.006706  | -2.922622 |
| 35            | 1             | 0           | 0.502127                | -2.292245 | 1.997186  |
| 36            | 1             | 0           | 1.851784                | -1.238700 | 2.412189  |
| 37            | 1             | 0           | 3.149144                | -3.118663 | -1.428769 |
| 38            | 1             | 0           | 3.219715                | -0.012563 | 1.545023  |
| 39            | 1             | 0           | 5.288094                | 0.839425  | 0.600213  |
| 40            | 1             | 0           | 5.259089                | -2.233124 | -2.385237 |
| 41            | 1             | 0           | 6.340822                | -0.240651 | -1.371085 |
| 42            | 1             | 0           | -3.092269               | -2.893201 | -1.372149 |
| 43            | 1             | 0           | -3.313060               | 0.144134  | 1.638655  |
| 44            | 1             | 0           | -5.697474               | 0.479647  | 1.129159  |
| 45            | 1             | 0           | -5.483538               | -2.558654 | -1.882687 |

Supplementary Material (ESI) for Chemical Communications  
This journal is (c) The Royal Society of Chemistry 2009

|    |   |   |           |           |           |
|----|---|---|-----------|-----------|-----------|
| 46 | 1 | 0 | -6.793871 | -0.868044 | -0.636357 |
| 47 | 1 | 0 | 1.583251  | 1.509335  | -1.359106 |
| 48 | 1 | 0 | -2.492805 | 2.333772  | -0.317510 |
| 49 | 1 | 0 | -1.947356 | 4.733316  | -0.105254 |
| 50 | 1 | 0 | 2.125096  | 3.887111  | -1.125791 |
| 51 | 1 | 0 | 0.369505  | 5.515320  | -0.500920 |
| 52 | 1 | 0 | -1.091150 | -0.077712 | 2.607371  |
| 53 | 1 | 0 | -0.575860 | 1.484145  | 1.721048  |
| 54 | 1 | 0 | 0.486779  | 0.896116  | 3.413950  |
| 55 | 1 | 0 | 2.425133  | 0.501700  | 3.628974  |
| 56 | 1 | 0 | 1.655413  | 2.283437  | 4.217034  |
| 57 | 1 | 0 | 1.828597  | 1.858070  | 2.246425  |

-----

HF=-1086.8195253

W= -605.4535

|                                              |              |
|----------------------------------------------|--------------|
| Zero-point correction=<br>(Hartree/Particle) | 0.486529     |
| Thermal correction to Energy=                | 0.511832     |
| Thermal correction to Enthalpy=              | 0.512776     |
| Thermal correction to Gibbs Free Energy=     | 0.430249     |
| Sum of electronic and zero-point Energies=   | -1086.332997 |
| Sum of electronic and thermal Energies=      | -1086.307693 |
| Sum of electronic and thermal Enthalpies=    | -1086.306749 |
| Sum of electronic and thermal Free Energies= | -1086.389276 |

Table T5: Cartesian coordinates, energy and imaginary frequency of B3LYP/6-31++G\*\* optimized conformation for **TS-b**.

Standard orientation:

| Center<br>Number | Atomic<br>Number | Atomic<br>Type | Coordinates (Angstroms) |           |           |
|------------------|------------------|----------------|-------------------------|-----------|-----------|
|                  |                  |                | X                       | Y         | Z         |
| 1                | 6                | 0              | -1.169247               | 4.236565  | -0.590259 |
| 2                | 6                | 0              | -2.560677               | 4.348683  | -0.608111 |
| 3                | 6                | 0              | -3.346467               | 3.199560  | -0.735991 |
| 4                | 6                | 0              | -2.737355               | 1.948319  | -0.842854 |
| 5                | 6                | 0              | -1.338261               | 1.823398  | -0.829267 |
| 6                | 6                | 0              | -0.561253               | 2.984047  | -0.705928 |
| 7                | 6                | 0              | -0.731858               | 0.435290  | -0.962583 |
| 8                | 6                | 0              | 0.513463                | 0.363684  | -1.852371 |
| 9                | 7                | 0              | -0.462590               | -0.248641 | 0.370990  |
| 10               | 6                | 0              | -0.627020               | 0.475218  | 1.654388  |
| 11               | 6                | 0              | 0.813942                | 0.450306  | 1.423482  |
| 12               | 6                | 0              | 1.766353                | -0.617603 | 1.933812  |
| 13               | 8                | 0              | 2.277243                | -1.459735 | 0.899294  |
| 14               | 6                | 0              | 3.404119                | -1.080561 | 0.198325  |
| 15               | 6                | 0              | 4.031488                | 0.164425  | 0.316651  |
| 16               | 6                | 0              | 5.169949                | 0.425220  | -0.456619 |
| 17               | 6                | 0              | 5.676759                | -0.527514 | -1.340733 |
| 18               | 6                | 0              | 5.035300                | -1.766980 | -1.450680 |
| 19               | 6                | 0              | 3.904437                | -2.046599 | -0.686117 |
| 20               | 6                | 0              | -0.721369               | -1.718783 | 0.369746  |
| 21               | 6                | 0              | -2.181723               | -2.093020 | 0.198713  |
| 22               | 6                | 0              | -2.651933               | -2.556698 | -1.038998 |
| 23               | 6                | 0              | -3.993626               | -2.907723 | -1.211889 |
| 24               | 6                | 0              | -4.886264               | -2.801895 | -0.143114 |
| 25               | 6                | 0              | -4.427814               | -2.355078 | 1.099897  |
| 26               | 6                | 0              | -3.086103               | -2.008951 | 1.269441  |
| 27               | 5                | 0              | 1.790548                | 2.713574  | 2.736121  |
| 28               | 1                | 0              | -0.333592               | -2.118607 | 1.307007  |
| 29               | 1                | 0              | -0.118109               | -2.152177 | -0.430053 |
| 30               | 1                | 0              | -1.506696               | -0.187068 | -1.418849 |
| 31               | 1                | 0              | 0.879339                | -0.663224 | -1.936745 |
| 32               | 1                | 0              | 1.335513                | 0.973799  | -1.472184 |
| 33               | 1                | 0              | 0.260793                | 0.720968  | -2.854971 |
| 34               | 1                | 0              | 1.257101                | -1.286008 | 2.632906  |
| 35               | 1                | 0              | 2.572111                | -0.118459 | 2.473022  |
| 36               | 1                | 0              | 3.661462                | 0.934762  | 0.987330  |
| 37               | 1                | 0              | 3.403891                | -3.007795 | -0.750746 |
| 38               | 1                | 0              | 5.419682                | -2.522730 | -2.129867 |
| 39               | 1                | 0              | 5.654740                | 1.392184  | -0.358071 |
| 40               | 1                | 0              | 6.559580                | -0.311752 | -1.934409 |
| 41               | 1                | 0              | -1.960717               | -2.656837 | -1.872546 |
| 42               | 1                | 0              | -2.743288               | -1.684792 | 2.247971  |
| 43               | 1                | 0              | -5.112194               | -2.285622 | 1.940190  |
| 44               | 1                | 0              | -4.337262               | -3.267498 | -2.177205 |

Supplementary Material (ESI) for Chemical Communications  
This journal is (c) The Royal Society of Chemistry 2009

|    |   |   |           |           |           |
|----|---|---|-----------|-----------|-----------|
| 45 | 1 | 0 | -5.928819 | -3.076159 | -0.273171 |
| 46 | 1 | 0 | 0.521701  | 2.929930  | -0.678150 |
| 47 | 1 | 0 | -3.353286 | 1.057461  | -0.939764 |
| 48 | 1 | 0 | -4.429702 | 3.276403  | -0.753170 |
| 49 | 1 | 0 | -0.549597 | 5.119741  | -0.472797 |
| 50 | 1 | 0 | -3.030059 | 5.323876  | -0.518786 |
| 51 | 1 | 0 | 1.264391  | 1.587238  | 2.968361  |
| 52 | 1 | 0 | 2.022382  | 3.195553  | 3.830167  |
| 53 | 1 | 0 | 0.984167  | 3.368529  | 2.088157  |
| 54 | 1 | 0 | 2.819965  | 2.520791  | 2.092541  |
| 55 | 1 | 0 | 1.223065  | 1.256426  | 0.833053  |
| 56 | 1 | 0 | -1.017028 | -0.147829 | 2.456013  |
| 57 | 1 | 0 | -1.121135 | 1.439535  | 1.589224  |

-----  
HF=-1087.3731085

W= -548.4066

|                                              |              |
|----------------------------------------------|--------------|
| Zero-point correction=                       | 0.479803     |
| (Hartree/Particle)                           |              |
| Thermal correction to Energy=                | 0.506060     |
| Thermal correction to Enthalpy=              | 0.507004     |
| Thermal correction to Gibbs Free Energy=     | 0.419901     |
| Sum of electronic and zero-point Energies=   | -1086.893306 |
| Sum of electronic and thermal Energies=      | -1086.867048 |
| Sum of electronic and thermal Enthalpies=    | -1086.866104 |
| Sum of electronic and thermal Free Energies= | -1086.953208 |

Table T6: Cartesian coordinates, energy and imaginary frequency of MPW1B95/6-31++G\*\* optimized conformation for **TS-b**.

Standard orientation:

| Center<br>Number | Atomic<br>Number | Atomic<br>Type | Coordinates (Angstroms) |           |           |
|------------------|------------------|----------------|-------------------------|-----------|-----------|
|                  |                  |                | X                       | Y         | Z         |
| 1                | 6                | 0              | -0.978597               | 4.179580  | -0.459392 |
| 2                | 6                | 0              | -2.358457               | 4.304964  | -0.534109 |
| 3                | 6                | 0              | -3.143333               | 3.178098  | -0.751273 |
| 4                | 6                | 0              | -2.543397               | 1.935160  | -0.891429 |
| 5                | 6                | 0              | -1.155904               | 1.800186  | -0.825681 |
| 6                | 6                | 0              | -0.378788               | 2.935340  | -0.610037 |
| 7                | 6                | 0              | -0.562277               | 0.421839  | -0.973670 |
| 8                | 6                | 0              | 0.748954                | 0.363029  | -1.737765 |
| 9                | 7                | 0              | -0.417968               | -0.297869 | 0.331293  |
| 10               | 6                | 0              | -0.666848               | 0.377863  | 1.607152  |
| 11               | 6                | 0              | 0.779830                | 0.363299  | 1.483186  |
| 12               | 6                | 0              | 1.678534                | -0.758236 | 1.946280  |
| 13               | 8                | 0              | 2.155868                | -1.553690 | 0.880696  |
| 14               | 6                | 0              | 3.257550                | -1.134546 | 0.190265  |
| 15               | 6                | 0              | 3.880071                | 0.094581  | 0.381388  |
| 16               | 6                | 0              | 4.996196                | 0.411915  | -0.387524 |
| 17               | 6                | 0              | 5.486222                | -0.468975 | -1.339870 |
| 18               | 6                | 0              | 4.847835                | -1.691709 | -1.524653 |
| 19               | 6                | 0              | 3.738997                | -2.027108 | -0.765358 |
| 20               | 6                | 0              | -0.714269               | -1.739253 | 0.259890  |
| 21               | 6                | 0              | -2.184122               | -2.030351 | 0.111802  |
| 22               | 6                | 0              | -2.743450               | -2.255204 | -1.145847 |
| 23               | 6                | 0              | -4.105687               | -2.486273 | -1.288701 |
| 24               | 6                | 0              | -4.928299               | -2.503479 | -0.169861 |
| 25               | 6                | 0              | -4.379818               | -2.305231 | 1.091278  |
| 26               | 6                | 0              | -3.017938               | -2.075949 | 1.229368  |
| 27               | 5                | 0              | 1.625711                | 2.463786  | 2.856733  |
| 28               | 1                | 0              | -0.319438               | -2.205752 | 1.160922  |
| 29               | 1                | 0              | -0.144513               | -2.144265 | -0.576730 |
| 30               | 1                | 0              | -1.302008               | -0.163185 | -1.524194 |
| 31               | 1                | 0              | 1.122452                | -0.661069 | -1.787930 |
| 32               | 1                | 0              | 1.528864                | 0.963310  | -1.269690 |
| 33               | 1                | 0              | 0.600692                | 0.730313  | -2.753417 |
| 34               | 1                | 0              | 1.135414                | -1.432982 | 2.608664  |
| 35               | 1                | 0              | 2.500531                | -0.325327 | 2.514053  |
| 36               | 1                | 0              | 3.518539                | 0.816131  | 1.105259  |
| 37               | 1                | 0              | 3.239304                | -2.979762 | -0.887225 |
| 38               | 1                | 0              | 5.219151                | -2.393862 | -2.260976 |
| 39               | 1                | 0              | 5.478017                | 1.369109  | -0.231463 |
| 40               | 1                | 0              | 6.354690                | -0.209813 | -1.931211 |
| 41               | 1                | 0              | -2.103487               | -2.265069 | -2.021829 |
| 42               | 1                | 0              | -2.599458               | -1.949368 | 2.221230  |
| 43               | 1                | 0              | -5.011401               | -2.338593 | 1.969991  |
| 44               | 1                | 0              | -4.522019               | -2.660800 | -2.272847 |

Supplementary Material (ESI) for Chemical Communications  
This journal is (c) The Royal Society of Chemistry 2009

|    |   |   |           |           |           |
|----|---|---|-----------|-----------|-----------|
| 45 | 1 | 0 | -5.989968 | -2.685330 | -0.278396 |
| 46 | 1 | 0 | 0.699278  | 2.866149  | -0.536921 |
| 47 | 1 | 0 | -3.156040 | 1.053919  | -1.052885 |
| 48 | 1 | 0 | -4.220840 | 3.267155  | -0.810618 |
| 49 | 1 | 0 | -0.360625 | 5.047473  | -0.270338 |
| 50 | 1 | 0 | -2.822307 | 5.276392  | -0.418229 |
| 51 | 1 | 0 | 1.177653  | 1.290465  | 3.031067  |
| 52 | 1 | 0 | 1.832174  | 2.883536  | 3.976661  |
| 53 | 1 | 0 | 0.764020  | 3.086414  | 2.255611  |
| 54 | 1 | 0 | 2.654344  | 2.374305  | 2.195855  |
| 55 | 1 | 0 | 1.219604  | 1.176700  | 0.923762  |
| 56 | 1 | 0 | -1.107163 | -0.272571 | 2.355614  |
| 57 | 1 | 0 | -1.153202 | 1.344809  | 1.545278  |

-----  
HF=-1086.8149294

W= -647.6705

|                                              |              |
|----------------------------------------------|--------------|
| Zero-point correction=<br>(Hartree/Particle) | 0.487136     |
| Thermal correction to Energy=                | 0.512262     |
| Thermal correction to Enthalpy=              | 0.513206     |
| Thermal correction to Gibbs Free Energy=     | 0.431544     |
| Sum of electronic and zero-point Energies=   | -1086.327793 |
| Sum of electronic and thermal Energies=      | -1086.302667 |
| Sum of electronic and thermal Enthalpies=    | -1086.301723 |
| Sum of electronic and thermal Free Energies= | -1086.383385 |

Table T7: Cartesian coordinates, energy and imaginary frequency of B3LYP/6-31++G\*\* optimized conformation for **product-a**.

Standard orientation:

| Center<br>Number | Atomic<br>Number | Atomic<br>Type | Coordinates (Angstroms) |           |           |
|------------------|------------------|----------------|-------------------------|-----------|-----------|
|                  |                  |                | X                       | Y         | Z         |
| 1                | 6                | 0              | 0.979758                | 3.647554  | -1.559302 |
| 2                | 6                | 0              | 0.010821                | 4.500952  | -1.031527 |
| 3                | 6                | 0              | -1.176958               | 3.960395  | -0.525487 |
| 4                | 6                | 0              | -1.381536               | 2.581141  | -0.545240 |
| 5                | 6                | 0              | -0.414690               | 1.708506  | -1.072922 |
| 6                | 6                | 0              | 0.766896                | 2.263430  | -1.581000 |
| 7                | 6                | 0              | -0.707347               | 0.204945  | -1.078279 |
| 8                | 6                | 0              | 0.203426                | -0.605618 | -2.016537 |
| 9                | 7                | 0              | -0.811060               | -0.303451 | 0.308055  |
| 10               | 6                | 0              | -0.165379               | 0.488895  | 2.555475  |
| 11               | 6                | 0              | 0.327452                | -0.106107 | 1.217666  |
| 12               | 6                | 0              | 1.190446                | -1.350386 | 1.533130  |
| 13               | 8                | 0              | 1.858460                | -1.928017 | 0.410120  |
| 14               | 6                | 0              | 3.103894                | -1.487198 | 0.048419  |
| 15               | 6                | 0              | 3.741329                | -2.240947 | -0.950223 |
| 16               | 6                | 0              | 5.010163                | -1.880057 | -1.395423 |
| 17               | 6                | 0              | 5.665647                | -0.767247 | -0.853384 |
| 18               | 6                | 0              | 5.027705                | -0.020708 | 0.136635  |
| 19               | 6                | 0              | 3.749139                | -0.367336 | 0.590719  |
| 20               | 6                | 0              | -1.580470               | -1.535249 | 0.467040  |
| 21               | 6                | 0              | -3.041145               | -1.401677 | 0.063367  |
| 22               | 6                | 0              | -3.609954               | -2.278078 | -0.868448 |
| 23               | 6                | 0              | -4.964270               | -2.185937 | -1.208377 |
| 24               | 6                | 0              | -5.768472               | -1.210786 | -0.616155 |
| 25               | 6                | 0              | -5.210749               | -0.329669 | 0.317523  |
| 26               | 6                | 0              | -3.859607               | -0.425756 | 0.652525  |
| 27               | 5                | 0              | 0.611023                | 1.388127  | 5.504952  |
| 28               | 1                | 0              | 0.975125                | 0.638554  | 0.746410  |
| 29               | 1                | 0              | -1.555038               | -1.804558 | 1.529042  |
| 30               | 1                | 0              | -1.140988               | -2.391449 | -0.073974 |
| 31               | 1                | 0              | -1.725498               | 0.106264  | -1.474959 |
| 32               | 1                | 0              | -0.091373               | -1.658814 | -2.014723 |
| 33               | 1                | 0              | 1.254488                | -0.562448 | -1.724872 |
| 34               | 1                | 0              | 0.113033                | -0.235233 | -3.043769 |
| 35               | 1                | 0              | 0.565699                | -2.156726 | 1.927115  |
| 36               | 1                | 0              | 1.918750                | -1.098433 | 2.312694  |
| 37               | 1                | 0              | 3.225009                | -3.105099 | -1.355677 |
| 38               | 1                | 0              | 3.275500                | 0.241562  | 1.351420  |
| 39               | 1                | 0              | 5.518954                | 0.848628  | 0.564667  |
| 40               | 1                | 0              | 5.492257                | -2.473952 | -2.166834 |
| 41               | 1                | 0              | 6.655917                | -0.488943 | -1.199900 |
| 42               | 1                | 0              | -2.988135               | -3.039211 | -1.334147 |
| 43               | 1                | 0              | -3.426220               | 0.260633  | 1.374622  |
| 44               | 1                | 0              | -5.831025               | 0.429739  | 0.785832  |

Supplementary Material (ESI) for Chemical Communications  
This journal is (c) The Royal Society of Chemistry 2009

|    |   |   |           |           |           |
|----|---|---|-----------|-----------|-----------|
| 45 | 1 | 0 | -5.386485 | -2.872902 | -1.936460 |
| 46 | 1 | 0 | -6.819877 | -1.135358 | -0.878207 |
| 47 | 1 | 0 | 1.534694  | 1.622671  | -2.001732 |
| 48 | 1 | 0 | -2.303616 | 2.164524  | -0.149800 |
| 49 | 1 | 0 | -1.943668 | 4.614605  | -0.119259 |
| 50 | 1 | 0 | 1.905418  | 4.053488  | -1.957956 |
| 51 | 1 | 0 | 0.174136  | 5.574796  | -1.017713 |
| 52 | 1 | 0 | -0.838602 | -0.199364 | 3.078301  |
| 53 | 1 | 0 | -0.704722 | 1.418860  | 2.366667  |
| 54 | 1 | 0 | 0.684407  | 0.704950  | 3.220350  |
| 55 | 1 | 0 | 1.280884  | 0.418289  | 5.690510  |
| 56 | 1 | 0 | -0.563274 | 1.347697  | 5.706496  |
| 57 | 1 | 0 | 1.122300  | 2.406507  | 5.152578  |

-----

HF=-1087.4595897

|                                              |              |
|----------------------------------------------|--------------|
| Zero-point correction=<br>(Hartree/Particle) | 0.480962     |
| Thermal correction to Energy=                | 0.508335     |
| Thermal correction to Enthalpy=              | 0.509279     |
| Thermal correction to Gibbs Free Energy=     | 0.416632     |
| Sum of electronic and zero-point Energies=   | -1086.978628 |
| Sum of electronic and thermal Energies=      | -1086.951255 |
| Sum of electronic and thermal Enthalpies=    | -1086.950310 |
| Sum of electronic and thermal Free Energies= | -1087.042958 |



Table T8: Cartesian coordinates and energy of MPW1B95/6-31++G\*\* optimized conformation for **product-a**.

Standard orientation:

| Center Number | Atomic Number | Atomic Type | Coordinates (Angstroms) |           |           |
|---------------|---------------|-------------|-------------------------|-----------|-----------|
|               |               |             | X                       | Y         | Z         |
| 1             | 6             | 0           | 0.533190                | 3.754190  | -1.633109 |
| 2             | 6             | 0           | -0.457467               | 4.514242  | -1.030862 |
| 3             | 6             | 0           | -1.518283               | 3.874941  | -0.395584 |
| 4             | 6             | 0           | -1.574687               | 2.490627  | -0.362159 |
| 5             | 6             | 0           | -0.583253               | 1.713218  | -0.964233 |
| 6             | 6             | 0           | 0.468588                | 2.363391  | -1.602060 |
| 7             | 6             | 0           | -0.709669               | 0.200670  | -0.900376 |
| 8             | 6             | 0           | 0.321026                | -0.541064 | -1.739325 |
| 9             | 7             | 0           | -0.778383               | -0.226871 | 0.497745  |
| 10            | 6             | 0           | -0.107662               | 0.843104  | 2.571389  |
| 11            | 6             | 0           | 0.372559                | 0.088795  | 1.336342  |
| 12            | 6             | 0           | 1.221525                | -1.099872 | 1.792894  |
| 13            | 8             | 0           | 1.742320                | -1.884916 | 0.741938  |
| 14            | 6             | 0           | 2.932484                | -1.547342 | 0.181373  |
| 15            | 6             | 0           | 3.449483                | -2.467365 | -0.730684 |
| 16            | 6             | 0           | 4.652043                | -2.213425 | -1.366931 |
| 17            | 6             | 0           | 5.358649                | -1.042903 | -1.104279 |
| 18            | 6             | 0           | 4.838219                | -0.131551 | -0.198796 |
| 19            | 6             | 0           | 3.626891                | -0.369113 | 0.444960  |
| 20            | 6             | 0           | -1.414274               | -1.509495 | 0.715459  |
| 21            | 6             | 0           | -2.853711               | -1.522404 | 0.267514  |
| 22            | 6             | 0           | -3.313259               | -2.454360 | -0.656513 |
| 23            | 6             | 0           | -4.648328               | -2.469170 | -1.047986 |
| 24            | 6             | 0           | -5.538669               | -1.546864 | -0.516580 |
| 25            | 6             | 0           | -5.088467               | -0.610823 | 0.409446  |
| 26            | 6             | 0           | -3.756693               | -0.600035 | 0.795818  |
| 27            | 5             | 0           | 2.050215                | 2.361651  | 3.206080  |
| 28            | 1             | 0           | 1.014812                | 0.758033  | 0.756318  |
| 29            | 1             | 0           | -1.401571               | -1.707913 | 1.791159  |
| 30            | 1             | 0           | -0.876414               | -2.344980 | 0.240105  |
| 31            | 1             | 0           | -1.697445               | -0.037898 | -1.309101 |
| 32            | 1             | 0           | 0.208534                | -1.617403 | -1.604705 |
| 33            | 1             | 0           | 1.341902                | -0.281131 | -1.456730 |
| 34            | 1             | 0           | 0.195093                | -0.312423 | -2.799479 |
| 35            | 1             | 0           | 0.617239                | -1.787036 | 2.387117  |
| 36            | 1             | 0           | 2.028821                | -0.742662 | 2.439802  |
| 37            | 1             | 0           | 2.890749                | -3.374603 | -0.920427 |
| 38            | 1             | 0           | 3.242143                | 0.371575  | 1.132276  |
| 39            | 1             | 0           | 5.371029                | 0.787189  | 0.013826  |
| 40            | 1             | 0           | 5.042823                | -2.937487 | -2.071263 |
| 41            | 1             | 0           | 6.299814                | -0.846469 | -1.600845 |
| 42            | 1             | 0           | -2.618280               | -3.173406 | -1.076529 |
| 43            | 1             | 0           | -3.399349               | 0.130438  | 1.513458  |
| 44            | 1             | 0           | -5.779178               | 0.109421  | 0.830942  |
| 45            | 1             | 0           | -4.989378               | -3.199397 | -1.771548 |

Supplementary Material (ESI) for Chemical Communications  
This journal is (c) The Royal Society of Chemistry 2009

|    |   |   |           |           |           |
|----|---|---|-----------|-----------|-----------|
| 46 | 1 | 0 | -6.577812 | -1.554912 | -0.821124 |
| 47 | 1 | 0 | 1.250386  | 1.789872  | -2.083207 |
| 48 | 1 | 0 | -2.395065 | 1.986735  | 0.136206  |
| 49 | 1 | 0 | -2.302050 | 4.458536  | 0.072249  |
| 50 | 1 | 0 | 1.363110  | 4.240069  | -2.131635 |
| 51 | 1 | 0 | -0.408062 | 5.595754  | -1.056243 |
| 52 | 1 | 0 | -0.828925 | 0.248824  | 3.140193  |
| 53 | 1 | 0 | -0.581312 | 1.778562  | 2.283035  |
| 54 | 1 | 0 | 0.711796  | 1.045792  | 3.288052  |
| 55 | 1 | 0 | 2.779475  | 1.482309  | 3.558233  |
| 56 | 1 | 0 | 1.498018  | 3.030821  | 4.022247  |
| 57 | 1 | 0 | 1.996738  | 2.658603  | 2.053181  |

-----

HF=-1086.894933

|                                              |              |
|----------------------------------------------|--------------|
| Zero-point correction=<br>(Hartree/Particle) | 0.488488     |
| Thermal correction to Energy=                | 0.514893     |
| Thermal correction to Enthalpy=              | 0.515837     |
| Thermal correction to Gibbs Free Energy=     | 0.430303     |
| Sum of electronic and zero-point Energies=   | -1086.406445 |
| Sum of electronic and thermal Energies=      | -1086.380040 |
| Sum of electronic and thermal Enthalpies=    | -1086.379096 |
| Sum of electronic and thermal Free Energies= | -1086.464630 |

Table T9: Cartesian coordinates and energy of B3LYP/6-31++G\*\* optimized conformation for **product-b**.

Standard orientation:

| Center<br>Number | Atomic<br>Number | Atomic<br>Type | Coordinates (Angstroms) |           |           |
|------------------|------------------|----------------|-------------------------|-----------|-----------|
|                  |                  |                | X                       | Y         | Z         |
| 1                | 6                | 0              | 2.804157                | -3.862075 | -1.446237 |
| 2                | 6                | 0              | 4.020040                | -3.709540 | -0.780635 |
| 3                | 6                | 0              | 4.294905                | -2.504535 | -0.123518 |
| 4                | 6                | 0              | 3.358046                | -1.472156 | -0.132614 |
| 5                | 6                | 0              | 2.126756                | -1.612365 | -0.795768 |
| 6                | 6                | 0              | 1.867327                | -2.820797 | -1.454486 |
| 7                | 6                | 0              | 1.152771                | -0.429215 | -0.792134 |
| 8                | 6                | 0              | -0.066748               | -0.614360 | -1.717878 |
| 9                | 7                | 0              | 0.842732                | -0.013758 | 0.589281  |
| 10               | 6                | 0              | 0.292830                | -0.988625 | 1.517956  |
| 11               | 6                | 0              | -1.208144               | -1.405576 | 1.472558  |
| 12               | 6                | 0              | -2.234042               | -0.451562 | 2.095488  |
| 13               | 8                | 0              | -2.570128               | 0.673536  | 1.276946  |
| 14               | 6                | 0              | -3.531912               | 0.557949  | 0.308087  |
| 15               | 6                | 0              | -4.189899               | -0.630774 | -0.035638 |
| 16               | 6                | 0              | -5.163413               | -0.612461 | -1.042330 |
| 17               | 6                | 0              | -5.484012               | 0.567869  | -1.712074 |
| 18               | 6                | 0              | -4.818779               | 1.750154  | -1.363998 |
| 19               | 6                | 0              | -3.851524               | 1.749692  | -0.362508 |
| 20               | 6                | 0              | 0.431627                | 1.380364  | 0.748885  |
| 21               | 6                | 0              | 1.538437                | 2.374176  | 0.429546  |
| 22               | 6                | 0              | 1.349424                | 3.377430  | -0.528502 |
| 23               | 6                | 0              | 2.353071                | 4.315213  | -0.796450 |
| 24               | 6                | 0              | 3.563993                | 4.259206  | -0.104329 |
| 25               | 6                | 0              | 3.764657                | 3.261394  | 0.856771  |
| 26               | 6                | 0              | 2.760453                | 2.328544  | 1.118308  |
| 27               | 5                | 0              | -2.169532               | -4.254298 | 1.959014  |
| 28               | 1                | 0              | 0.138442                | 1.508853  | 1.797205  |
| 29               | 1                | 0              | -0.461994               | 1.640047  | 0.161693  |
| 30               | 1                | 0              | 1.717273                | 0.417350  | -1.205129 |
| 31               | 1                | 0              | -0.733408               | 0.249263  | -1.645000 |
| 32               | 1                | 0              | -0.653861               | -1.505361 | -1.478998 |
| 33               | 1                | 0              | 0.255425                | -0.697003 | -2.761735 |
| 34               | 1                | 0              | -1.828849               | -0.012314 | 3.013358  |
| 35               | 1                | 0              | -3.148186               | -0.992538 | 2.366624  |
| 36               | 1                | 0              | -3.956959               | -1.566571 | 0.457753  |
| 37               | 1                | 0              | -3.337155               | 2.661016  | -0.074583 |
| 38               | 1                | 0              | -5.058114               | 2.680064  | -1.872144 |
| 39               | 1                | 0              | -5.667591               | -1.539342 | -1.301220 |
| 40               | 1                | 0              | -6.238696               | 0.570193  | -2.492188 |
| 41               | 1                | 0              | 0.407988                | 3.425664  | -1.071010 |
| 42               | 1                | 0              | 2.918670                | 1.552471  | 1.862590  |
| 43               | 1                | 0              | 4.702869                | 3.214102  | 1.402973  |
| 44               | 1                | 0              | 2.188217                | 5.084117  | -1.546152 |
| 45               | 1                | 0              | 4.345684                | 4.984998  | -0.309568 |

Supplementary Material (ESI) for Chemical Communications  
This journal is (c) The Royal Society of Chemistry 2009

|    |   |   |           |           |           |
|----|---|---|-----------|-----------|-----------|
| 46 | 1 | 0 | 0.932732  | -2.964817 | -1.985845 |
| 47 | 1 | 0 | 3.571650  | -0.539765 | 0.381161  |
| 48 | 1 | 0 | 5.241524  | -2.369536 | 0.392750  |
| 49 | 1 | 0 | 2.577769  | -4.790704 | -1.962946 |
| 50 | 1 | 0 | 4.747773  | -4.515977 | -0.774950 |
| 51 | 1 | 0 | -1.256833 | -2.329484 | 2.082129  |
| 52 | 1 | 0 | -2.006169 | -4.243240 | 3.141237  |
| 53 | 1 | 0 | -1.325172 | -4.693900 | 1.242035  |
| 54 | 1 | 0 | -3.207711 | -3.884637 | 1.501849  |
| 55 | 1 | 0 | -1.512684 | -1.678531 | 0.459804  |
| 56 | 1 | 0 | 0.499597  | -0.626019 | 2.535688  |
| 57 | 1 | 0 | 0.877206  | -1.906595 | 1.396005  |

-----

HF=-1087.457019

|                                              |              |
|----------------------------------------------|--------------|
| Zero-point correction=<br>(Hartree/Particle) | 0.481847     |
| Thermal correction to Energy=                | 0.509618     |
| Thermal correction to Enthalpy=              | 0.510562     |
| Thermal correction to Gibbs Free Energy=     | 0.415512     |
| Sum of electronic and zero-point Energies=   | -1086.975172 |
| Sum of electronic and thermal Energies=      | -1086.947401 |
| Sum of electronic and thermal Enthalpies=    | -1086.946457 |
| Sum of electronic and thermal Free Energies= | -1087.041507 |

Table T10: Cartesian coordinates and energy of MPW1B95/6-31++G\*\* optimized conformation for **product-b**.

Standard orientation:

| Center Number | Atomic Number | Atomic Type | Coordinates (Angstroms) |           |           |
|---------------|---------------|-------------|-------------------------|-----------|-----------|
|               |               |             | X                       | Y         | Z         |
| 1             | 6             | 0           | -0.553563               | 4.191539  | -1.522582 |
| 2             | 6             | 0           | -1.729109               | 4.717191  | -1.009128 |
| 3             | 6             | 0           | -2.641835               | 3.870487  | -0.386580 |
| 4             | 6             | 0           | -2.371447               | 2.515451  | -0.281123 |
| 5             | 6             | 0           | -1.190241               | 1.973598  | -0.791923 |
| 6             | 6             | 0           | -0.286858               | 2.829167  | -1.414521 |
| 7             | 6             | 0           | -0.956887               | 0.481767  | -0.651251 |
| 8             | 6             | 0           | 0.246728                | -0.033627 | -1.433542 |
| 9             | 7             | 0           | -1.003994               | 0.097738  | 0.759515  |
| 10            | 6             | 0           | -0.233747               | 0.840817  | 1.725144  |
| 11            | 6             | 0           | 1.298548                | 0.711620  | 1.769095  |
| 12            | 6             | 0           | 1.874574                | -0.660938 | 2.084817  |
| 13            | 8             | 0           | 1.991290                | -1.494574 | 0.946359  |
| 14            | 6             | 0           | 3.060439                | -1.334459 | 0.122918  |
| 15            | 6             | 0           | 4.009363                | -0.322968 | 0.249196  |
| 16            | 6             | 0           | 5.063305                | -0.256334 | -0.657608 |
| 17            | 6             | 0           | 5.179872                | -1.176203 | -1.687457 |
| 18            | 6             | 0           | 4.223754                | -2.181136 | -1.807595 |
| 19            | 6             | 0           | 3.171529                | -2.262988 | -0.912099 |
| 20            | 6             | 0           | -1.166364               | -1.320351 | 1.007472  |
| 21            | 6             | 0           | -2.468649               | -1.860838 | 0.468227  |
| 22            | 6             | 0           | -2.502270               | -3.054091 | -0.245699 |
| 23            | 6             | 0           | -3.705988               | -3.571886 | -0.711751 |
| 24            | 6             | 0           | -4.892935               | -2.893404 | -0.472795 |
| 25            | 6             | 0           | -4.869453               | -1.696836 | 0.236894  |
| 26            | 6             | 0           | -3.666678               | -1.187527 | 0.703796  |
| 27            | 5             | 0           | 2.857119                | 2.715605  | 2.752727  |
| 28            | 1             | 0           | -1.163635               | -1.451825 | 2.095200  |
| 29            | 1             | 0           | -0.338013               | -1.932454 | 0.625794  |
| 30            | 1             | 0           | -1.837329               | -0.001014 | -1.092988 |
| 31            | 1             | 0           | 0.352574                | -1.110543 | -1.302549 |
| 32            | 1             | 0           | 1.186132                | 0.426146  | -1.126760 |
| 33            | 1             | 0           | 0.111717                | 0.157715  | -2.499965 |
| 34            | 1             | 0           | 1.213809                | -1.201943 | 2.764810  |
| 35            | 1             | 0           | 2.848827                | -0.572383 | 2.574500  |
| 36            | 1             | 0           | 3.944538                | 0.417653  | 1.033762  |
| 37            | 1             | 0           | 2.425432                | -3.043420 | -0.989376 |
| 38            | 1             | 0           | 4.299315                | -2.910895 | -2.604297 |
| 39            | 1             | 0           | 5.796142                | 0.533827  | -0.549673 |
| 40            | 1             | 0           | 6.001960                | -1.114903 | -2.388366 |
| 41            | 1             | 0           | -1.575236               | -3.582735 | -0.439993 |
| 42            | 1             | 0           | -3.639163               | -0.254157 | 1.254401  |
| 43            | 1             | 0           | -5.792229               | -1.162231 | 0.427407  |
| 44            | 1             | 0           | -3.713956               | -4.501622 | -1.267336 |
| 45            | 1             | 0           | -5.831488               | -3.291016 | -0.838530 |

Supplementary Material (ESI) for Chemical Communications  
This journal is (c) The Royal Society of Chemistry 2009

|    |   |   |           |          |           |
|----|---|---|-----------|----------|-----------|
| 46 | 1 | 0 | 0.635060  | 2.439386 | -1.826484 |
| 47 | 1 | 0 | -3.077234 | 1.853698 | 0.207597  |
| 48 | 1 | 0 | -3.566133 | 4.269164 | 0.013740  |
| 49 | 1 | 0 | 0.163791  | 4.839826 | -2.010852 |
| 50 | 1 | 0 | -1.936696 | 5.776633 | -1.093760 |
| 51 | 1 | 0 | 1.593977  | 1.372405 | 2.612390  |
| 52 | 1 | 0 | 2.284296  | 2.956524 | 3.771972  |
| 53 | 1 | 0 | 2.626858  | 3.354056 | 1.774692  |
| 54 | 1 | 0 | 3.769636  | 1.945555 | 2.765598  |
| 55 | 1 | 0 | 1.754208  | 1.108840 | 0.861362  |
| 56 | 1 | 0 | -0.617242 | 0.564783 | 2.714040  |
| 57 | 1 | 0 | -0.460386 | 1.901039 | 1.591118  |

-----

HF=-1086.8912655

|                                              |              |
|----------------------------------------------|--------------|
| Zero-point correction=<br>(Hartree/Particle) | 0.489882     |
| Thermal correction to Energy=                | 0.516059     |
| Thermal correction to Enthalpy=              | 0.517003     |
| Thermal correction to Gibbs Free Energy=     | 0.429747     |
| Sum of electronic and zero-point Energies=   | -1086.401384 |
| Sum of electronic and thermal Energies=      | -1086.375207 |
| Sum of electronic and thermal Enthalpies=    | -1086.374262 |
| Sum of electronic and thermal Free Energies= | -1086.461518 |

Table T11: Cartesian coordinates and single point energy of B3LYP/6-31++G\*\* for **2A**.

Standard orientation:

| Center<br>Number | Atomic<br>Number | Atomic<br>Type | Coordinates (Angstroms) |           |           |
|------------------|------------------|----------------|-------------------------|-----------|-----------|
|                  |                  |                | X                       | Y         | Z         |
| 1                | 6                | 0              | -2.737496               | -2.194423 | 1.092622  |
| 2                | 6                | 0              | -1.764710               | -2.120944 | 0.083370  |
| 3                | 6                | 0              | -2.085097               | -2.599385 | -1.195628 |
| 4                | 6                | 0              | -3.352518               | -3.120799 | -1.468081 |
| 5                | 6                | 0              | -4.317789               | -3.171156 | -0.460188 |
| 6                | 6                | 0              | -4.006161               | -2.709146 | 0.822212  |
| 7                | 6                | 0              | -0.376266               | -1.592260 | 0.366293  |
| 8                | 7                | 0              | -0.301121               | -0.091985 | 0.529956  |
| 9                | 6                | 0              | 0.822104                | 0.483828  | 1.376009  |
| 10               | 6                | 0              | 1.916298                | -0.421241 | 1.912552  |
| 11               | 8                | 0              | 2.609258                | -1.122135 | 0.885775  |
| 12               | 6                | 0              | 3.742538                | -0.576171 | 0.301495  |
| 13               | 6                | 0              | 4.148651                | 0.751434  | 0.457612  |
| 14               | 6                | 0              | 5.311057                | 1.179052  | -0.196359 |
| 15               | 6                | 0              | 6.052685                | 0.308966  | -0.996339 |
| 16               | 6                | 0              | 5.625939                | -1.015648 | -1.146649 |
| 17               | 6                | 0              | 4.474794                | -1.461921 | -0.499542 |
| 18               | 6                | 0              | -0.721588               | 0.679223  | -0.756913 |
| 19               | 6                | 0              | 0.522715                | 1.042814  | -1.567704 |
| 20               | 6                | 0              | -1.682436               | 1.821938  | -0.491587 |
| 21               | 6                | 0              | -3.059802               | 1.588300  | -0.644283 |
| 22               | 6                | 0              | -3.983808               | 2.615492  | -0.447229 |
| 23               | 6                | 0              | -3.539481               | 3.891932  | -0.088827 |
| 24               | 6                | 0              | -2.172784               | 4.131019  | 0.070592  |
| 25               | 6                | 0              | -1.244090               | 3.106603  | -0.134217 |
| 26               | 6                | 0              | -0.556700               | 0.472420  | 1.897565  |
| 27               | 1                | 0              | 0.021032                | -2.032035 | 1.280180  |
| 28               | 1                | 0              | 0.314293                | -1.844636 | -0.439957 |
| 29               | 1                | 0              | -1.283241               | -0.079509 | -1.302128 |
| 30               | 1                | 0              | 1.170506                | 0.172699  | -1.713127 |
| 31               | 1                | 0              | 1.112016                | 1.836888  | -1.103350 |
| 32               | 1                | 0              | 0.198714                | 1.394539  | -2.551448 |
| 33               | 1                | 0              | 1.514309                | -1.194251 | 2.574758  |
| 34               | 1                | 0              | 2.581676                | 0.217230  | 2.503271  |
| 35               | 1                | 0              | 3.587552                | 1.465970  | 1.053892  |
| 36               | 1                | 0              | 4.137075                | -2.489459 | -0.593443 |
| 37               | 1                | 0              | 6.193572                | -1.707009 | -1.763138 |
| 38               | 1                | 0              | 5.621928                | 2.212364  | -0.074777 |
| 39               | 1                | 0              | 6.950779                | 0.655768  | -1.498146 |
| 40               | 1                | 0              | -1.335508               | -2.573078 | -1.982825 |
| 41               | 1                | 0              | -2.507338               | -1.857641 | 2.099278  |
| 42               | 1                | 0              | -4.747388               | -2.758018 | 1.614139  |
| 43               | 1                | 0              | -3.581690               | -3.488953 | -2.463499 |
| 44               | 1                | 0              | -5.303382               | -3.576277 | -0.668435 |
| 45               | 1                | 0              | -0.190260               | 3.316600  | 0.025879  |
| 46               | 1                | 0              | -3.411185               | 0.598448  | -0.925573 |
| 47               | 1                | 0              | -5.044485               | 2.420492  | -0.576212 |

Supplementary Material (ESI) for Chemical Communications  
This journal is (c) The Royal Society of Chemistry 2009

|    |   |   |           |           |          |
|----|---|---|-----------|-----------|----------|
| 48 | 1 | 0 | -1.816612 | 5.113870  | 0.362776 |
| 49 | 1 | 0 | -4.255383 | 4.693905  | 0.066704 |
| 50 | 1 | 0 | 1.165256  | 1.453155  | 1.010944 |
| 51 | 1 | 0 | -0.847832 | -0.274900 | 2.629106 |
| 52 | 1 | 0 | -1.106948 | 1.405261  | 1.918577 |

---

HF=-1059.9852059



Table T12: Cartesian coordinates and single point energy of B3LYP/6-31++G\*\* for **2A** in geometry of **TS-a**.

Standard orientation:

| Center<br>Number | Atomic<br>Number | Atomic<br>Type | Coordinates (Angstroms) |           |           |
|------------------|------------------|----------------|-------------------------|-----------|-----------|
|                  |                  |                | X                       | Y         | Z         |
| 1                | 6                | 0              | -3.668770               | -1.098715 | 0.983963  |
| 2                | 6                | 0              | -2.735464               | -1.675453 | 0.108161  |
| 3                | 6                | 0              | -3.199008               | -2.286848 | -1.063940 |
| 4                | 6                | 0              | -4.564750               | -2.317632 | -1.362413 |
| 5                | 6                | 0              | -5.483625               | -1.732687 | -0.489314 |
| 6                | 6                | 0              | -5.031770               | -1.123224 | 0.685947  |
| 7                | 6                | 0              | -1.257254               | -1.684971 | 0.438771  |
| 8                | 7                | 0              | -0.644814               | -0.326200 | 0.488600  |
| 9                | 6                | 0              | 0.631968                | -0.148485 | 1.264148  |
| 10               | 6                | 0              | 1.459036                | -1.335602 | 1.715424  |
| 11               | 8                | 0              | 2.193020                | -1.904328 | 0.632278  |
| 12               | 6                | 0              | 3.392722                | -1.335214 | 0.254016  |
| 13               | 6                | 0              | 4.029380                | -1.958413 | -0.828926 |
| 14               | 6                | 0              | 5.248929                | -1.469294 | -1.292266 |
| 15               | 6                | 0              | 5.844164                | -0.357550 | -0.684043 |
| 16               | 6                | 0              | 5.201751                | 0.254511  | 0.392414  |
| 17               | 6                | 0              | 3.974273                | -0.221021 | 0.871739  |
| 18               | 6                | 0              | -0.799632               | 0.489166  | -0.783112 |
| 19               | 6                | 0              | 0.187295                | -0.001896 | -1.849185 |
| 20               | 6                | 0              | -0.759918               | 1.989486  | -0.527627 |
| 21               | 6                | 0              | -1.958123               | 2.649712  | -0.209179 |
| 22               | 6                | 0              | -1.977798               | 4.024176  | 0.030246  |
| 23               | 6                | 0              | -0.793555               | 4.763004  | -0.046293 |
| 24               | 6                | 0              | 0.401991                | 4.120073  | -0.370785 |
| 25               | 6                | 0              | 0.418262                | 2.744142  | -0.615338 |
| 26               | 6                | 0              | -0.471965               | 0.379720  | 2.053743  |
| 27               | 1                | 0              | 1.247722                | 0.623381  | 0.812532  |
| 28               | 1                | 0              | -1.108518               | -2.140397 | 1.419209  |
| 29               | 1                | 0              | -0.704908               | -2.294468 | -0.284024 |
| 30               | 1                | 0              | -1.813275               | 0.256653  | -1.116965 |
| 31               | 1                | 0              | 0.033515                | -1.061239 | -2.071365 |
| 32               | 1                | 0              | 1.229588                | 0.122937  | -1.545596 |
| 33               | 1                | 0              | 0.030967                | 0.562350  | -2.772886 |
| 34               | 1                | 0              | 0.844102                | -2.146848 | 2.109544  |
| 35               | 1                | 0              | 2.097573                | -0.984903 | 2.532046  |
| 36               | 1                | 0              | 3.559716                | -2.825147 | -1.283454 |
| 37               | 1                | 0              | 3.506790                | 0.281703  | 1.713072  |
| 38               | 1                | 0              | 5.650483                | 1.115784  | 0.878732  |
| 39               | 1                | 0              | 5.737408                | -1.961413 | -2.128613 |
| 40               | 1                | 0              | 6.795549                | 0.021484  | -1.044100 |
| 41               | 1                | 0              | -2.489265               | -2.747415 | -1.746766 |
| 42               | 1                | 0              | -3.332790               | -0.630426 | 1.904765  |
| 43               | 1                | 0              | -5.741579               | -0.674709 | 1.374697  |
| 44               | 1                | 0              | -4.906743               | -2.797646 | -2.274444 |
| 45               | 1                | 0              | -6.544844               | -1.755110 | -0.718012 |

Supplementary Material (ESI) for Chemical Communications  
This journal is (c) The Royal Society of Chemistry 2009

|    |   |   |           |           |           |
|----|---|---|-----------|-----------|-----------|
| 46 | 1 | 0 | 1.359895  | 2.271061  | -0.874853 |
| 47 | 1 | 0 | -2.881905 | 2.079161  | -0.148108 |
| 48 | 1 | 0 | -2.914182 | 4.516663  | 0.275098  |
| 49 | 1 | 0 | 1.327161  | 4.684923  | -0.428777 |
| 50 | 1 | 0 | -0.803336 | 5.831612  | 0.145514  |
| 51 | 1 | 0 | -1.012650 | -0.258148 | 2.738765  |
| 52 | 1 | 0 | -0.725772 | 1.426266  | 1.998655  |

-----  
HF=-1059.9741222

Table T13: Cartesian coordinates and single point energy of B3LYP/6-31++G\*\* for **2A** in geometry of **TS-b**.

Standard orientation:

| Center Number | Atomic Number | Atomic Type | Coordinates (Angstroms) |           |           |
|---------------|---------------|-------------|-------------------------|-----------|-----------|
|               |               |             | X                       | Y         | Z         |
| 1             | 6             | 0           | -2.947418               | -2.154006 | 1.078627  |
| 2             | 6             | 0           | -2.010825               | -2.074595 | 0.035594  |
| 3             | 6             | 0           | -2.424727               | -2.410947 | -1.261933 |
| 4             | 6             | 0           | -3.743532               | -2.796260 | -1.517933 |
| 5             | 6             | 0           | -4.669348               | -2.853340 | -0.473955 |
| 6             | 6             | 0           | -4.266561               | -2.534819 | 0.826509  |
| 7             | 6             | 0           | -0.574550               | -1.660989 | 0.296326  |
| 8             | 7             | 0           | -0.383873               | -0.191274 | 0.474834  |
| 9             | 6             | 0           | -0.616944               | 0.370967  | 1.826753  |
| 10            | 6             | 0           | 0.829479                | 0.434364  | 1.641952  |
| 11            | 6             | 0           | 1.815556                | -0.644102 | 2.057304  |
| 12            | 8             | 0           | 2.393132                | -1.337878 | 0.950279  |
| 13            | 6             | 0           | 3.520334                | -0.832270 | 0.334847  |
| 14            | 6             | 0           | 4.086199                | 0.416096  | 0.615845  |
| 15            | 6             | 0           | 5.232425                | 0.813113  | -0.084579 |
| 16            | 6             | 0           | 5.806851                | -0.008075 | -1.055096 |
| 17            | 6             | 0           | 5.226421                | -1.252538 | -1.327581 |
| 18            | 6             | 0           | 4.088897                | -1.666886 | -0.637690 |
| 19            | 6             | 0           | -0.647308               | 0.630845  | -0.779520 |
| 20            | 6             | 0           | 0.624154                | 0.716107  | -1.630278 |
| 21            | 6             | 0           | -1.320445               | 1.967012  | -0.507701 |
| 22            | 6             | 0           | -2.722895               | 2.033032  | -0.552776 |
| 23            | 6             | 0           | -3.391704               | 3.236340  | -0.323031 |
| 24            | 6             | 0           | -2.663512               | 4.395219  | -0.038356 |
| 25            | 6             | 0           | -1.269424               | 4.341080  | 0.012168  |
| 26            | 6             | 0           | -0.601424               | 3.137481  | -0.226503 |
| 27            | 1             | 0           | -0.194876               | -2.150108 | 1.193711  |
| 28            | 1             | 0           | 0.069954                | -1.972500 | -0.527693 |
| 29            | 1             | 0           | -1.379727               | 0.033299  | -1.329415 |
| 30            | 1             | 0           | 1.039115                | -0.277556 | -1.819925 |
| 31            | 1             | 0           | 1.406399                | 1.312340  | -1.155782 |
| 32            | 1             | 0           | 0.383166                | 1.176347  | -2.592985 |
| 33            | 1             | 0           | 1.318457                | -1.410235 | 2.657944  |
| 34            | 1             | 0           | 2.582225                | -0.177137 | 2.676416  |
| 35            | 1             | 0           | 3.662673                | 1.086885  | 1.358016  |
| 36            | 1             | 0           | 3.635125                | -2.634493 | -0.828607 |
| 37            | 1             | 0           | 5.663845                | -1.907268 | -2.076040 |
| 38            | 1             | 0           | 5.669279                | 1.781821  | 0.140183  |
| 39            | 1             | 0           | 6.694906                | 0.312518  | -1.590778 |
| 40            | 1             | 0           | -1.706814               | -2.384098 | -2.078322 |
| 41            | 1             | 0           | -2.647113               | -1.931422 | 2.098625  |
| 42            | 1             | 0           | -4.976429               | -2.592595 | 1.646290  |
| 43            | 1             | 0           | -4.043374               | -3.055768 | -2.528928 |
| 44            | 1             | 0           | -5.694169               | -3.154738 | -0.668786 |
| 45            | 1             | 0           | 0.481689                | 3.126627  | -0.169584 |

Supplementary Material (ESI) for Chemical Communications  
This journal is (c) The Royal Society of Chemistry 2009

|    |   |   |           |           |           |
|----|---|---|-----------|-----------|-----------|
| 46 | 1 | 0 | -3.294237 | 1.134074  | -0.771485 |
| 47 | 1 | 0 | -4.476437 | 3.268497  | -0.366827 |
| 48 | 1 | 0 | -0.694585 | 5.230188  | 0.250519  |
| 49 | 1 | 0 | -3.179587 | 5.332588  | 0.146868  |
| 50 | 1 | 0 | 1.217245  | 1.320275  | 1.161729  |
| 51 | 1 | 0 | -0.999910 | -0.356996 | 2.538302  |
| 52 | 1 | 0 | -1.152951 | 1.314426  | 1.856531  |

---

HF=-1059.9679025

**Preparation of 6:** To a solution of 2-(aryloxymethyl)aziridine **5a** (0.23 g, 0.694 mmol) in CH<sub>3</sub>CN (2.3 mL) was added 0.13 g of benzyl bromide (0.763 mmol) at rt. The resulting mixture was refluxed for 12 h and then quenched with H<sub>2</sub>O. The mixture was extracted with CH<sub>2</sub>Cl<sub>2</sub> and the combined organic layer was dried over anhydrous MgSO<sub>4</sub>, filtered and concentrated under reduced pressure. Purification by silica gel column chromatography provided analytically pure product **6a** in 95% yield.

**6a:** <sup>1</sup>H NMR (300 MHz, CDCl<sub>3</sub>): δ 1.42 (3H, J=6.9 Hz, CH<sub>3</sub>); 2.98 (2H, J=7.2 Hz, CHCH<sub>2</sub>N); 3.59 (1H, J=6.5, 10.0 Hz, (HCH)O); 3.66 and 3.69 (2H, J=13.5 Hz, Ar(HCH)N); 3.78 (3H, OCH<sub>3</sub>); 3.93-4.1 (3H, CHBr, CHN and (HCH)O); 6.66 and 6.80 (2H and 2H, J=9.0, 9.3 Hz, CH<sub>arom</sub>), 7.22-7.38 (10H, CH<sub>arom</sub>). <sup>13</sup>C NMR (75 MHz, CDCl<sub>3</sub>): δ 11.9 (CH<sub>3</sub>); 49.6 (CHBr); 54.0 (CHCH<sub>2</sub>N); 56.0 (ArCH<sub>2</sub>N); 58.1 (CHN); 70.1 (CH<sub>2</sub>O); 114.3, 115.8, 127.1, 127.3, 128.1, 128.2, 128.4, 128.9, 139.7, 142.6, 152.4, 154.1 (CH<sub>arom</sub>, CO, NCH<sub>2</sub>C<sub>quat</sub> and NCHC<sub>quat</sub>). HRMS m/z exact mass calcd for C<sub>25</sub>H<sub>28</sub>BrNO<sub>2</sub>: 453.1303; Found 453.1306.

**6b:** <sup>1</sup>H NMR (300 MHz, CDCl<sub>3</sub>): δ 1.42 (3H, J=6.9 Hz, CH<sub>3</sub>); 2.98 (2H, J=7.2 Hz, CHCH<sub>2</sub>N); 3.59 (1H, J=6.5, 10.0 Hz, (HCH)O); 3.66 and 3.69 (2H, J=13.5 Hz, Ar(HCH)N); 3.93-4.51 (3H, CHBr, CHN and (HCH)O); 6.59-6.64, 6.91-6.95 and 7.13-7.41 (2H, 1H and 11H, CH<sub>arom</sub>). <sup>13</sup>C NMR (75 MHz, CDCl<sub>3</sub>): δ 11.9 (CH<sub>3</sub>); 49.6 (CHBr); 54.0 (CHCH<sub>2</sub>N); 56.0 (ArCH<sub>2</sub>N); 58.1 (CHN); 70.1 (CH<sub>2</sub>O); 113.2, 114.7, 121.0, 127.1, 127.3, 128.0, 128.1, 128.4, 128.9 and 129.98 (CH<sub>arom</sub>); 134.7 (CCl); 139.4 and 142.5 (NCH<sub>2</sub>C<sub>quat</sub> and NCHC<sub>quat</sub>); 158.9 (CO). HRMS m/z exact mass calcd for C<sub>24</sub>H<sub>25</sub>BrClNO: 457.0808; Found 457.0810.

**6c:** <sup>1</sup>H NMR (300 MHz, CDCl<sub>3</sub>): δ 1.42 (3H, J=6.9 Hz, CH<sub>3</sub>); 2.98 (2H, J=7.2 Hz, CHCH<sub>2</sub>N); 3.62 (1H, J=6.5, 10.0 Hz, (HCH)O); 3.66 and 3.69 (2H, J=13.5 Hz, Ar(HCH)N); 3.93-4.1 (3H, CHBr, CHN and (HCH)O); 6.59-6.64, 7.15-7.21 and 7.22-7.41 (2H, 2H and 10H, CH<sub>arom</sub>). <sup>13</sup>C NMR (75 MHz, CDCl<sub>3</sub>): δ 11.9 (CH<sub>3</sub>); 49.6 (CHBr); 54.0 (CHCH<sub>2</sub>N); 56.0 (ArCH<sub>2</sub>N); 58.1 (CHN); 70.1 (CH<sub>2</sub>O); 115.9, 125.5, 126.8, 127.0, 127.8, 128.2, 128.4, 128.5, 129.5, 142.4, 144.7, 157.8 (CH<sub>arom</sub>). HRMS m/z exact mass calcd for C<sub>24</sub>H<sub>25</sub>BrClNO: 457.0808; Found 457.0811.

**6d:**  $^1\text{H}$  NMR (300 MHz,  $\text{CDCl}_3$ ):  $\delta$  1.42 (3H,  $J=6.9$  Hz,  $\text{CH}_3$ ); 2.98 (2H,  $J=7.2$  Hz,  $\text{CHCH}_2\text{N}$ ); 3.62 (1H,  $J=6.5, 10.0$  Hz,  $(\text{HCH})\text{O}$ ); 3.66 and 3.69 (2H,  $J=13.5$  Hz,  $\text{Ar}(\text{HCH})\text{N}$ ); 3.93-4.2 (3H,  $\text{CHBr}$ ,  $\text{CHN}$  and  $(\text{HCH})\text{O}$ ); 6.69-6.72, 6.92-6.96 and 7.20-7.40 (2H, 1H and 12H,  $\text{CH}_{\text{arom}}$ ).  $^{13}\text{C}$  NMR (75 MHz,  $\text{CDCl}_3$ ):  $\delta$  11.9 ( $\text{CH}_3$ ); 49.6 ( $\text{CHBr}$ ); 54.0 ( $\text{CHCH}_2\text{N}$ ); 56.0 ( $\text{ArCH}_2\text{N}$ ); 58.1 ( $\text{CHN}$ ); 70.1 ( $\text{CH}_2\text{O}$ ); 114.4, 120.3, 126.8, 127.0, 127.8, 128.2, 128.4, 128.8, 129.3, 138.6, 145.2, 159.4 ( $\text{CH}_{\text{arom}}$ ). HRMS  $m/z$  exact mass calcd for  $\text{C}_{24}\text{H}_{26}\text{BrNO}$ : 423.1198; Found 423.1196.

**6e:**  $^1\text{H}$  NMR (500 MHz,  $\text{CDCl}_3$ ):  $\delta$  1.41 (3H,  $J=7.0$  Hz,  $\text{CHCH}_3$ ); 2.91 (2H,  $J=8.5, 1.5$  Hz,  $\text{NCH}_2\text{CHBr}$ ); 3.18 (3H,  $\text{CH}_3\text{O}$ ); 3.30 (1H,  $J=4.5, 6.5$  Hz,  $\text{OCH}_2\text{CHBr}$ ); 3.56 (1H,  $J=4.0, 7.0$  Hz,  $\text{OCH}_2\text{CHBr}$ ); 3.63 (2H,  $J=2.5$ ,  $\text{CH}_2\text{Ar}$ ); 3.85-3.92 (1H,  $\text{BrCH}$ ); 3.95 (1H,  $\text{CH}_3\text{CHN}$ ), 3.94 (1H,  $J=6.9$ ,  $\text{ArCHCH}_3$ ), 7.22-7.42 (10H,  $\text{CH}_{\text{arom}}$ ).  $^{13}\text{C}$  NMR (75 MHz,  $\text{CDCl}_3$ ):  $\delta$  13.6, 52.0, 54.8, 55.9, 58.6, 58.8, 74.8, 127.2, 127.3, 128.3, 128.5, 129.0, 129.0, 140.1, 142.8  
HRMS  $m/z$  exact mass calcd for  $\text{C}_{19}\text{H}_{24}\text{BrNO}$ : 361.1041; Found 361.1043.

**6f:**  $^1\text{H}$  NMR (300 MHz,  $\text{CDCl}_3$ ):  $\delta$  1.11 (3H,  $J=7.2$  Hz,  $\text{OCH}_2\text{CH}_3$ ); 1.41 (3H,  $J=6.9$  Hz,  $\text{CHCH}_3$ ); 2.91 (2H,  $J=7.5$  Hz,  $\text{NCH}_2\text{CHBr}$ ); 3.30 and 3.34 (1H and 2H,  $J=4.5$  and  $6.9$  Hz,  $\text{CHCH}_2\text{O}$  and  $\text{CH}_3\text{CH}_2\text{O}$ ); 3.59 (1H,  $J=4.5$ ,  $\text{CHCH}_2\text{O}$ ); 3.62 (2H,  $\text{CH}_2\text{Ar}$ ); 3.82-3.88 (1H,  $\text{BrCHCH}_2$ ), 3.94 (1H,  $J=6.9$ ,  $\text{ArCHCH}_3$ ), 7.22-7.42 (10H,  $\text{CH}_{\text{arom}}$ ).  $^{13}\text{C}$  NMR (75 MHz,  $\text{CDCl}_3$ ):  $\delta$  11.5, 13.6, 52.1, 54.7, 56.0, 58.6, 58.9, 74.8, 127.2, 127.3, 128.3, 128.5, 129.0, 129.0, 140.1, 142.8. HRMS  $m/z$  exact mass calcd for  $\text{C}_{20}\text{H}_{26}\text{BrNO}$ : 375.1198; Found 375.1196.

**Preparation of 7:** To a mixture of  $\text{NaBH}_4$  (0.016 g, 0.43 mmol) in THF (0.5 mL) was added 2-bromopropylamine **6a** (650 mg, 0.14 mmol) at rt. The resulting mixture was refluxed for 4 h and then quenched with  $\text{H}_2\text{O}$ . The mixture was extracted with  $\text{CH}_2\text{Cl}_2$  and the combined organic layer was dried over anhydrous  $\text{MgSO}_4$ , filtered and concentrated under reduced pressure. Purification by silica gel column chromatography provided analytically pure product **7a** in 90% yield.

**7a:**  $^1\text{H}$  NMR (300 MHz,  $\text{CDCl}_3$ ):  $\delta$  0.96, 1.35 (3H,  $J=6.9$  Hz,  $\text{CH}_3$ ); 3.36 (1H,  $\text{NCHCH}_3$ ); 3.68 and 3.72 (2H,  $J=6.9, 7.8, 9.3$  Hz,  $\text{CHCH}_2\text{O}$ ,  $\text{Ar}(\text{HCH})\text{N}$ ); 3.88-3.98 (3H,  $\text{CHCH}_2\text{O}$ ,  $\text{Ar}(\text{HCH})\text{N}$ ,  $\text{CHN}$ ); 6.70-6.82, 7.15-7.44 (4H, 10H,  $\text{CH}_{\text{arom}}$ ).  $^{13}\text{C}$  NMR (75 MHz,  $\text{CDCl}_3$ ):  $\delta$  13.9, 19.6, 50.5,

51.8, 55.9, 58.4, 72.3, 114.8, 115.5, 126.6, 126.8, 127.8, 128.2, 128.3, 128.3, 142.4, 144.8, 153.4, 153.8. HRMS m/z exact mass calcd for C<sub>25</sub>H<sub>29</sub>NO<sub>2</sub>: 375.2198; Found 375.2196.

**7b:** <sup>1</sup>H NMR (300 MHz, CDCl<sub>3</sub>): δ 0.96, 1.35 (3H, J=6.9 Hz, CH<sub>3</sub>); 3.36 (1H, NCHCH<sub>3</sub>); 3.68 and 3.72 (2H, J=6.9, 7.8, 9.3 Hz, CHCH<sub>2</sub>O, Ar(HCH)N); 3.88-3.98 (3H, CHCH<sub>2</sub>O, Ar(HCH)N, CHN); 6.70-6.74, 6.82-6.85, 6.88-6.92, 7.12-7.44 (3x1H, 11H, CH<sub>arom</sub>). <sup>13</sup>C NMR (75 MHz, CDCl<sub>3</sub>): δ 13.9, 20.1, 50.5, 51.7, 58.6, 71.9, 112.5, 115.2, 120.4, 127.2, 127.3, 128.4, 128.4, 128.8, 128.8, 130.7, 136.1, 138.6, 145.2, 158.8. HRMS m/z exact mass calcd for C<sub>24</sub>H<sub>26</sub>ClNO: 379.1703; Found 379.1706.

**7c:** <sup>1</sup>H NMR (300 MHz, CDCl<sub>3</sub>): δ 0.96, 1.35 (3H, J=6.9 Hz, CH<sub>3</sub>); 3.36 (1H, NCHCH<sub>3</sub>); 3.68 and 3.72 (2H, J=6.9, 7.8, 9.3 Hz, CHCH<sub>2</sub>O, Ar(HCH)N); 3.88-4.00 (3H, CHCH<sub>2</sub>O, Ar(HCH)N, CHN); 6.74, 7.16-7.44 (2H, 12H, CH<sub>arom</sub>). <sup>13</sup>C NMR (75 MHz, CDCl<sub>3</sub>): δ 13.6, 19.9, 50.5, 51.7, 58.7, 71.9, 115.9, 125.5, 126.8, 127.0, 127.9, 128.2, 128.4, 128.5, 129.5, 142.4, 144.7, 157.8. HRMS m/z exact mass calcd for C<sub>24</sub>H<sub>26</sub>ClNO: 379.1703; Found 379.1705.

**7d:** <sup>1</sup>H NMR (300 MHz, CDCl<sub>3</sub>): δ 0.96, 1.35 (3H, J=6.9 Hz, CH<sub>3</sub>); 3.38 (1H, NCHCH<sub>3</sub>); 3.68 and 3.72 (2H, J=6.9, 7.8, 9.3 Hz, CHCH<sub>2</sub>O, Ar(HCH)N); 3.88-4.05 (3H, CHCH<sub>2</sub>O, Ar(HCH)N, CHN); 6.83, 6.91, 7.15-7.46 (2H, 1H, 12H, CH<sub>arom</sub>). <sup>13</sup>C NMR (75 MHz, CDCl<sub>3</sub>): δ 13.8, 20.1, 50.5, 51.8, 58.7, 71.8, 114.5, 120.3, 127.2, 127.3, 128.4, 128.5, 128.8, 128.9, 129.3, 138.6, 145.2, 159.4. HRMS m/z exact mass calcd for C<sub>24</sub>H<sub>27</sub>NO: 345.2093; Found 345.2097.

**7e:** <sup>1</sup>H NMR (500 MHz, CDCl<sub>3</sub>): δ 0.87, 1.31 (3H, J=6.5, 7.0 Hz, CH<sub>3</sub>); 3.10-3.19 (1H, NCHCH<sub>3</sub>); 3.19 (1H, J=1.5, 7.0, 7.5 Hz, CHCH<sub>2</sub>O); 3.28 (3H, OCH<sub>3</sub>); 3.47 (1H, J=5.0, 5.5, 4.0, CHCH<sub>2</sub>O); 3.66 and 3.83 (1H and 1H, J=15.0, 15.5 Hz, CH<sub>2</sub>Ar); 3.92 (1H, J=6.5, 7.0 Hz, CH<sub>3</sub>CHN); 7.18-7.44 (10H, CH<sub>arom</sub>). <sup>13</sup>C NMR (75 MHz, CDCl<sub>3</sub>): δ 13.6, 19.8, 51.8, 59.3, 59.7, 61.4, 79.3, 127.2, 127.3, 128.3, 128.4, 128.7, 128.8, 139.6, 142.8. HRMS m/z exact mass calcd for C<sub>19</sub>H<sub>25</sub>NO: 283.1936; Found 283.1939.

**7f:** <sup>1</sup>H NMR (500 MHz, CDCl<sub>3</sub>): δ 0.90 (3H, J=7.0 Hz, CH<sub>3</sub>); 1.11 (3H, J=7.2 Hz, OCH<sub>2</sub>CH<sub>3</sub>); 1.31 (3H, J=7.0 Hz, CH<sub>3</sub>); 3.11-3.20 (1H, NCHCH<sub>3</sub>); 3.21 (1H, J=1.4, 7.0, 7.4 Hz, CHCH<sub>2</sub>O);

3.31 (2H, J=6.9 Hz, OCH<sub>2</sub>CH<sub>3</sub>); 3.47 (1H, J=5.0, 5.5, 4.0, CHCH<sub>2</sub>O); 3.67 and 3.82 (1H and 1H, J=15.0, 15.5 Hz, CH<sub>2</sub>Ar); 3.92 (1H, J=6.5, 7.0 Hz, CH<sub>3</sub>CHN); 7.17-7.44 (10H, CH<sub>arom</sub>). <sup>13</sup>C NMR (75 MHz, CDCl<sub>3</sub>): δ 11.5, 13.6, 19.9, 52.1, 59.3, 59.7, 61.5, 79.8, 127.2, 127.3, 128.3, 128.5, 128.7, 128.8, 139.8, 142.8. HRMS m/z exact mass calcd for C<sub>20</sub>H<sub>27</sub>NO: 297.2093; Found 297.2090.

**Reaction of 6 with LiAlH<sub>4</sub>:** To a mixture of LiAlH<sub>4</sub> (3 mg, 79 μmol) in THF (0.33 mL) was added 2-bromopropylamine **6a** (30 mg, 66 μmol) at rt. The resulting mixture was stirred for 4 h at rt and then quenched with EtOAc and H<sub>2</sub>O. The mixture was extracted with CH<sub>2</sub>Cl<sub>2</sub> and the combined organic layer was dried over anhydrous MgSO<sub>4</sub>, filtered and concentrated under reduced pressure. Purification by silica gel column chromatography provided analytically pure product **7a** (40%) and **8** (30%).

**8:** <sup>1</sup>H NMR (300 MHz, CDCl<sub>3</sub>): δ 1.38 (3H, J=6.7 Hz, CH<sub>3</sub>); 2.98 and 3.14 (1H and 1H, J=6.3, 8.4 Hz, CHCH<sub>2</sub>N); 3.51 (2H, J=14.1, 17.4 Hz, Ar(HCH)N); 3.94 (1H, J=6.9 Hz, CH<sub>3</sub>CHN); 5.06-5.21 (2H, J=12.3, 19.5 Hz, CH=CH<sub>2</sub>); 5.78-5.94 (1H, CH=CH<sub>2</sub>); 7.15-7.46 (10H, CH<sub>arom</sub>). <sup>13</sup>C NMR (75 MHz, CDCl<sub>3</sub>): δ 15.9, 52.6, 53.9, 57.8, 117.1, 126.9, 126.9, 128.0, 128.3, 128.4, 128.8, 136.9, 140.9, 144.0. HRMS m/z exact mass calcd for C<sub>18</sub>H<sub>21</sub>N: 251.1674; Found 251.1679.
